# Supplementary material for: The Potentiating Effect of Graphene Oxide on the Arylhydrocarbon Receptor (AhR)–Cytochrome P4501A (Cyp1A) System Activated by Benzo(k)fluoranthene (BkF) in Rainbow Trout Cell Line
Source: MDPI journal article supplement (doi:10.3390/nano13182501), 2023-09-05
Supplement: s1 [file s1]

Table S1: Primers for quantitative PCR analysis of gene expression.

| Target gene   | Primers sequence (5' . .3')        | Product size (bp) | Reference |
|---------------|------------------------------------|-------------------|-----------|
| <i>eef-1a</i> | Sense: TGCCCCTGGACACAGAGATT        | 90                | [61]      |
|               | Antisense: CCCACACCACCAGCAACAA     |                   |           |
| <i>cyp1a</i>  | Sense: TCAACTTACCTCTGCTGGAAGC      | 68                | [62]      |
|               | Antisense: GATGAACGGCAGGAAGGA      |                   |           |
| <i>ahr</i>    | Sense: GTGTTCTATGCCTCTCCTACTATC    | 90                | [63]      |
|               | Antisense: GTCATCTGTGTGGATCAGCTCAA |                   |           |

Table S2: Fluorescence quenching: dose dependent attenuation of fluorescence intensity caused by GO.

| GO g/ml | Resorufin EROD |       | Resorufin AB |       | HFC        |       | 5'-CF |      | NR      |      | ROS  |      |
|---------|----------------|-------|--------------|-------|------------|-------|-------|------|---------|------|------|------|
|         | ( M)           |       | ( M)         |       | BFCOD ( M) |       | ( M)  |      | (mg/ml) |      | ( M) |      |
|         | 5              | 0.5   | 1            | 0.1   | 40         | 4     | 4     | 0.4  | 0.3     | 0.03 | 100  | 10   |
| 75      | 16.5           | 11.00 | 16.37        | 17.76 | 16.5       | 15.41 | 10.86 | 8.03 | 7.62    | 9.38 | 5.67 | 7.68 |
| 37.5    | 8.68           | 5.73  | 8.35         | 6.92  | 11.03      | 6.78  | 7.56  | 0.09 | 0       | 1.74 | 1.98 | 1.05 |
| 18.75   | 3.42           | 1.41  | 2.94         | 1.79  | 3.39       | 0.5   | 1.29  | 0.4  | 0       | 0.20 | 0.5  | 0.3  |
| 9.4     | 5.8            | 1.64  | 2.87         | 0     | 2.66       | 0.6   | 3.79  | 0    | 0       | 1.18 | 0    | 0.1  |
| 4.7     | 6              | 0     | 0.27         | 0     | 3.1        | 0.75  | 1.62  | 0    | 0       | 0    | 0    | 0    |
| 2.3     | 1.63           | 0     | 2.87         | 0     | 3.72       | 0.07  | 0     | 0    | 0       | 0    | 0    | 0    |
| 1.17    | 0              | 0     | 0            | 0     | 0          | 0     | 0     | 0    | 0       | 0    | 0    | 0    |
| 0.6     | 0              | 0     | 0            | 0     | 0          | 0     | 0     | 0    | 0       | 0    | 0    | 0    |
| 0.3     | 0              | 0     | 0            | 0     | 0          | 0     | 0     | 0    | 0       | 0    | 0    | 0    |

For all fluorophores a dose dependent attenuation of fluorescence intensity (%) was determined. Only at the highest concentration of GO suspension tested (75 g/ml) was the degree of quenching between 10% and 20%. The degree of quenching was independent of the fluorophore concentration.

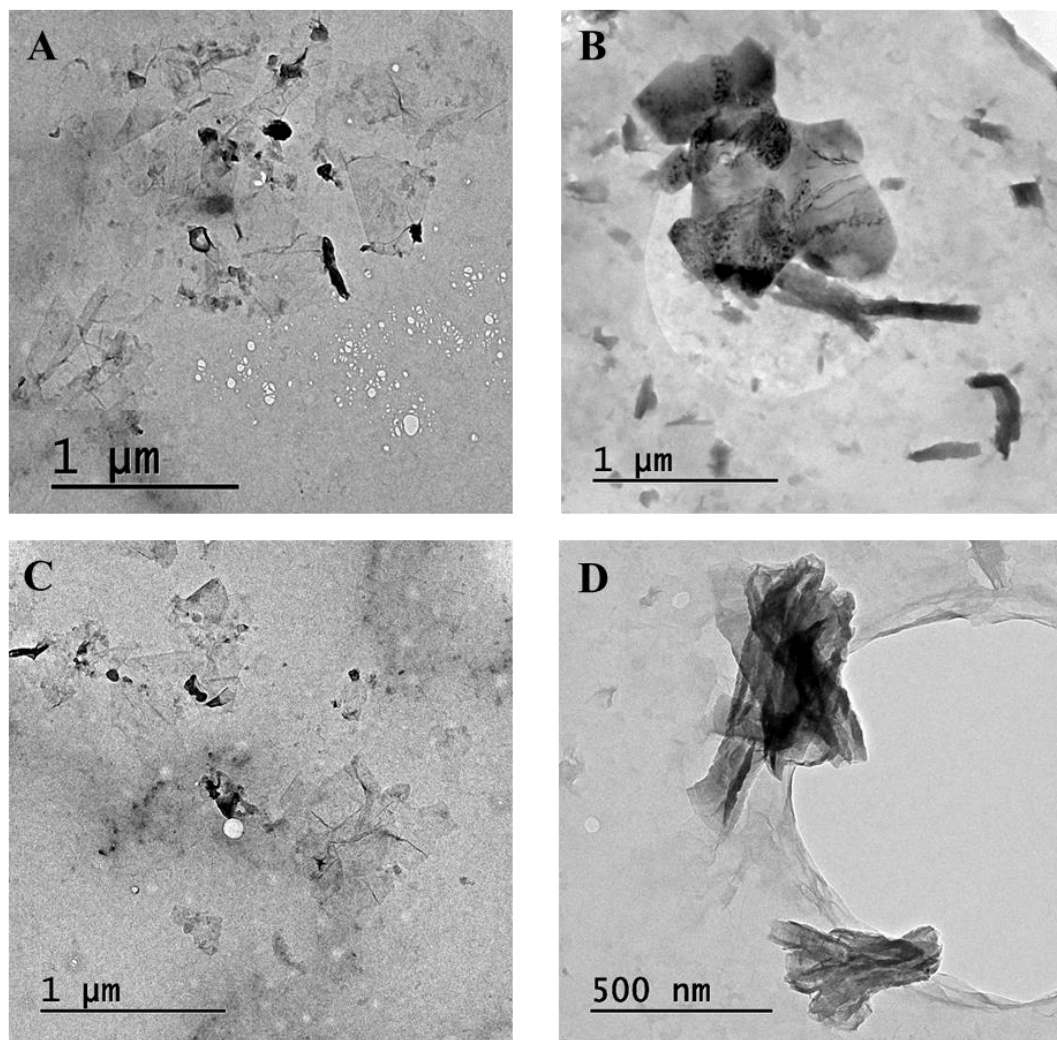

**Figure S1.** TEM micrographs of GO suspensions in MilliQ water (A, C) and in L-15 media (B, D) confirmed the presence of single or few layer graphene sheets, The images revealed no remarkable differences in size or shape between Milli-Q water (Fig.S1A, C) and L-15 media dispersions (Fig. S1B, D at different exposure times; 0 days (A, B) and 7 days (C, D).

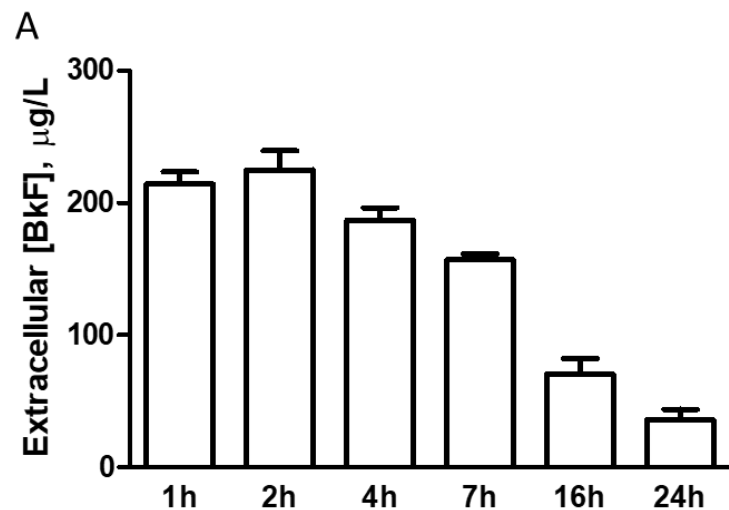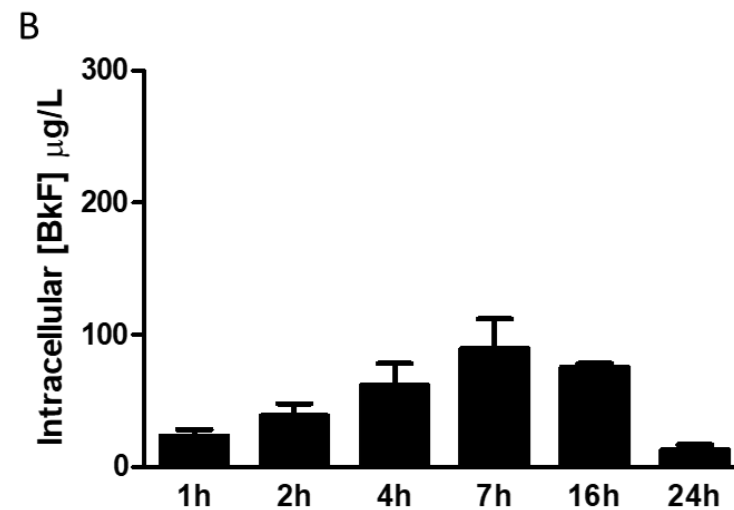

**Figure S2.** Extracellular (A) and intracellular (B) BkF levels assessed by means of SPE-HPLC-FLD. RTL-W1 cells were exposed to BkF at 1 M (252.31 µg/L) for different times (1h to 24h, period corresponding to pre-exposure to BkF). Media and cells were collected and processed to BkF determination.
